# Supplementary material for: The HIFα-Stabilizing Drug Roxadustat Increases the Number of Renal Epo-Producing Sca-1+ Cells
Source: MDPI journal article supplement (doi:10.3390/cells11040753), 2022-02-21
Supplement: s1 [file s1]

**Supplementary Table S1:** List of significantly ( $p < 0.05$ ) regulated genes in Sca-1<sup>+</sup> cells isolated from the kidneys of roxadustat-treated mice (7 days, 33 mg/kg body weight, i.p.) compared to Sca-1<sup>+</sup> cells isolated from solvent-treated control mice (7 days, vehicle, i.p.). Listed are the 50 most induced and the 50 most down-regulated genes as determined by RNAseq.

| Gene Name                                                             | Gene          | log2 fold change |
|-----------------------------------------------------------------------|---------------|------------------|
| chemokine (C-C motif) ligand 8                                        | Ccl8          | 4,32             |
| predicted gene 15564                                                  | Gm15564       | 4,05             |
| periostin, osteoblast specific factor                                 | Postn         | 3,88             |
| sialic acid binding Ig-like lectin 1, sialoadhesin                    | Siglec1       | 3,84             |
| triggering receptor expressed on myeloid cells 2                      | Trem2         | 3,37             |
| chemokine (C-X-C motif) ligand 5                                      | Cxcl5         | 3,26             |
| RIKEN cDNA 9030619P08 gene                                            | 9030619P08Rik | 3,21             |
| collagen, type III, alpha 1                                           | Col3a1        | 3,11             |
| tissue inhibitor of metalloproteinase 1                               | Timp1         | 3,10             |
| fibrillin 2                                                           | Fbn2          | 3,09             |
| leucine rich repeat containing 17                                     | Lrrc17        | 2,82             |
| hedgehog interacting protein-like 1                                   | Hhip1         | 2,80             |
| serine (or cysteine) peptidase inhibitor, clade B, member 2           | Serpib2       | 2,73             |
| chemokine (C-C motif) ligand 6                                        | Ccl6          | 2,71             |
| H19, imprinted maternally expressed transcript                        | H19           | 2,61             |
| mitochondria localized glutamic acid rich protein                     | Mgarp         | 2,59             |
| collagen, type I, alpha 2                                             | Col1a2        | 2,58             |
| lumican                                                               | Lum           | 2,52             |
| collagen, type I, alpha 1                                             | Col1a1        | 2,48             |
| lymphatic vessel endothelial hyaluronan receptor 1                    | Lyve1         | 2,45             |
| lysyl oxidase                                                         | Lox           | 2,43             |
| cartilage intermediate layer protein, nucleotide pyrophosphohydrolase | Cilp          | 2,42             |
| leucyl-tRNA synthetase, mitochondrial                                 | Lars2         | 2,39             |
| membrane-spanning 4-domains, subfamily A, member 7                    | Ms4a7         | 2,39             |
| arginase, liver                                                       | Arg1          | 2,38             |
| RNA imprinted and accumulated in nucleus                              | Rian          | 2,37             |
| carbonic anhydrase 9                                                  | Car9          | 2,36             |
| protease, serine 35                                                   | Prss35        | 2,34             |
| WAP four-disulfide core domain 17                                     | Wfdc17        | 2,32             |
| a disintegrin and metallopeptidase domain 12 (meltrin alpha)          | Adam12        | 2,32             |
| predicted gene, 43921                                                 | Gm43921       | 2,31             |
| matrix metallopeptidase 3                                             | Mmp3          | 2,31             |
| coagulation factor XIII, A1 subunit                                   | F13a1         | 2,19             |
| alpha-2-macroglobulin                                                 | A2m           | 2,19             |
| epiregulin                                                            | Ereg          | 2,19             |
| olfactory receptor 1033                                               | Olfr1033      | 2,17             |
| ficolin A                                                             | Fcna          | 2,16             |
| membrane-spanning 4-domains, subfamily A, member 6D                   | Ms4a6d        | 2,14             |
| reticulocalbin 3, EF-hand calcium binding domain                      | Rcn3          | 2,11             |
| microfibrillar-associated protein 4                                   | Mfap4         | 2,10             |
| predicted gene, 16754                                                 | Gm16754       | 2,10             |
| carboxypeptidase X 1 (M14 family)                                     | Cpxm1         | 2,09             |
| miRNA containing gene                                                 | Mirg          | 2,08             |
| tenascin C                                                            | Tnc           | 2,07             |
| arylsulfatase i                                                       | Arsi          | 2,03             |
| transmembrane protein 45a                                             | Tmem45a       | 2,02             |
| lysozyme 2                                                            | Lyz2          | 2,01             |
| asporin                                                               | Aspn          | 2,00             |
| sushi-repeat-containing protein, X-linked 2                           | Srpx2         | 1,98             |
| collagen, type V, alpha 3                                             | Col5a3        | 1,98             |

| Gene Name                                                               | Gene          | log2 fold change |
|-------------------------------------------------------------------------|---------------|------------------|
| D site albumin promoter binding protein                                 | Dbp           | -1,29            |
| UDP-GlcNAc:betaGal beta-1,3-N-acetylglucosaminyltransferase 3           | B3gnt3        | -1,29            |
| latent transforming growth factor beta binding protein 4                | Ltbp4         | -1,31            |
| archaelysin family metallopeptidase 1                                   | Amz1          | -1,31            |
| aquaporin 2                                                             | Aqp2          | -1,33            |
| endoglin                                                                | Eng           | -1,35            |
| phosphatidylinositol-4-phosphate 3-kinase catalytic subunit type 2 beta | Pik3c2b       | -1,35            |
| cilia and flagella associated protein 54                                | Cfap54        | -1,35            |
| aquaporin 4                                                             | Aqp4          | -1,37            |
| glycerophosphodiester phosphodiesterase domain containing 3             | Gdpd3         | -1,37            |
| histocompatibility 2, Q region locus 6                                  | H2-Q6         | -1,38            |
| proprotein convertase subtilisin/kexin type 9                           | Pcsk9         | -1,39            |
| arylsulfatase J                                                         | Arsj          | -1,39            |
| lymphocyte protein tyrosine kinase                                      | Lck           | -1,43            |
| heat shock protein 12B                                                  | Hspa12b       | -1,47            |
| cytochrome P450, family 2, subfamily a, polypeptide 5                   | Cyp2a5        | -1,51            |
| leiomodulin 1 (smooth muscle)                                           | Lmod1         | -1,51            |
| serine (or cysteine) peptidase inhibitor, clade A, member 1D            | Serpina1d     | -1,53            |
| solute carrier family 14 (urea transporter), member 2                   | Slc14a2       | -1,56            |
| C-type lectin domain family 18, member A                                | Clec18a       | -1,59            |
| chemokine (C-X-C motif) receptor 6                                      | Cxcr6         | -1,59            |
| carbonic anhydrase 3                                                    | Car3          | -1,78            |
| predicted gene 4759                                                     | Gm4759        | -1,80            |
| heme oxygenase 1                                                        | Hmox1         | -1,83            |
| AF4/FMR2 family, member 3                                               | Aff3          | -1,88            |
| basic helix-loop-helix family, member e41                               | Bhlhe41       | -1,90            |
| expressed sequence AA465934                                             | AA465934      | -2,18            |
| cytochrome P450, family 4, subfamily a, polypeptide 12a                 | Cyp4a12a      | -2,37            |
| formiminotransferase cyclodeaminase                                     | Ftcd          | -2,59            |
| SH3 domain containing ring finger 3                                     | Sh3rf3        | -2,69            |
| polycystic kidney disease 1 like 1                                      | Pkd1l1        | -2,78            |
| predicted gene 11868                                                    | Gm11868       | -2,79            |
| predicted gene 4353                                                     | Gm4353        | -2,82            |
| NEL-like 2                                                              | Nell2         | -2,91            |
| glutathione S-transferase, alpha 1 (Ya)                                 | Gsta1         | -2,93            |
| tubulin, beta 4A class IVA                                              | Tubb4a        | -3,15            |
| valosin containing protein, related sequence                            | Vcp-rs        | -3,16            |
| predicted gene 7292                                                     | Gm7292        | -3,21            |
| predicted gene 15920                                                    | Gm15920       | -3,34            |
| proliferating cell nuclear antigen pseudogene 2                         | Pcna-ps2      | -3,36            |
| predicted gene 11942                                                    | Gm11942       | -4,28            |
| predicted pseudogene 6916                                               | RP23-412J12.1 | -4,29            |
| predicted pseudogene 10320                                              | Gm10320       | -4,55            |
| UDP glycosyltransferase 1 family, polypeptide A10                       | Ugt1a10       | -5,39            |
| predicted gene 10263                                                    | Gm10263       | -5,68            |
| UDP glucuronosyltransferase 1 family, polypeptide A8                    | Ugt1a8        | -5,89            |
| ribosomal protein S2, pseudogene 13                                     | Rps2-ps13     | -5,91            |
| cDNA sequence BC018473                                                  | BC018473      | -6,11            |
| UDP glucuronosyltransferase 1 family, polypeptide A9                    | Ugt1a9        | -6,20            |
| predicted gene 15375                                                    | Gm15375       | -7,55            |

**Supplementary Table S2:** List of significantly ( $p < 0.05$ ) enriched pathways in Sca-1<sup>+</sup> MACS-sorted cells isolated from the kidneys of roxadustat-injected mice (seven days, 33 mg/kg body weight) in comparison to control-treated mice (seven days, solvent control). The input list contained all genes that were at least log2 1.5-fold induced or down-regulated as determined by RNAseq.

| <b>pathway up-regulated</b>                                                 | <b>p-value</b> |
|-----------------------------------------------------------------------------|----------------|
| Assembly of collagen fibrils and other multimeric structures                | 1.09E-3        |
| MET activates PTK2 signaling                                                | 1.95E-3        |
| ECM proteoglycans                                                           | 2.3E-3         |
| Integrin cell surface interactions                                          | 2.76E-3        |
| Degradation of the extracellular matrix                                     | 3.16E-3        |
| Extracellular matrix organization                                           | 3.22E-3        |
| Collagen degradation                                                        | 4.12E-3        |
| Non-integrin membrane-ECM interactions                                      | 5.24E-3        |
| Collagen chain trimerization                                                | 5.24E-3        |
| MET promotes cell motility                                                  | 6.69E-3        |
| Collagen formation                                                          | 7.8E-3         |
| Crosslinking of collagen fibrils                                            | 8.83E-3        |
| Platelet Adhesion to exposed collagen                                       | 1.49E-2        |
| GP1b-IX-V activation signalling                                             | 1.76E-2        |
| Anchoring fibril formation                                                  | 2.99E-2        |
| Collagen biosynthesis and modifying enzymes                                 | 3.51E-2        |
| Elastic fibre formation                                                     | 3.83E-2        |
| <b>pathway down-regulated</b>                                               | <b>p-value</b> |
| Passive transport by Aquaporins                                             | 1.66E-2        |
| Insertion of tail-anchored proteins into the endoplasmic reticulum membrane | 2.39E-2        |
| Glucuronidation                                                             | 3.85E-2        |

**Supplementary Table S3:** List of significantly ( $p < 0.05$ ) regulated genes in to Sca-1<sup>+</sup> MACS-sorted cells after 21 days in culture compared to Sca-1<sup>+</sup> MACS-sorted cells at the day of isolation. Listed are the 100 most induced and the 100 most down-regulated genes as determined by RNAseq.

| Gene Name                                                                                        | Gene          | log2 fold change |
|--------------------------------------------------------------------------------------------------|---------------|------------------|
| collagen, type XI, alpha 1                                                                       | Col11a1       | 11,40            |
| cyclin dependent kinase inhibitor 2A                                                             | Cdkn2a        | 10,62            |
| actin, gamma 2, smooth muscle, enteric                                                           | Actg2         | 10,60            |
| latent transforming growth factor beta binding protein 2                                         | Ltbp2         | 10,09            |
| G protein-coupled receptor 176                                                                   | Gpr176        | 9,95             |
| solute carrier family 1 (high affinity aspartate/glutamate transporter), member 6                | Slc1a6        | 9,60             |
| solute carrier family 5 (choline transporter), member 7                                          | Slc5a7        | 9,58             |
| carboxypeptidase A6                                                                              | Cpa6          | 9,29             |
| AHNK nucleoprotein 2                                                                             | Ahnak2        | 9,18             |
| cellular communication network factor 5                                                          | Wisp2         | 9,15             |
| growth differentiation factor 6                                                                  | Gdf6          | 9,14             |
| cellular communication network factor 3                                                          | Nov           | 9,13             |
| lysyl oxidase                                                                                    | Lox           | 9,06             |
| collagen, type XII, alpha 1                                                                      | Col12a1       | 9,04             |
| predicted gene, 43921                                                                            | Gm43921       | 9,01             |
| serine (or cysteine) peptidase inhibitor, clade B, member 9b                                     | Serpinb9b     | 8,97             |
| periostin, osteoblast specific factor                                                            | Postn         | 8,92             |
| polypeptide N-acetylgalactosaminyltransferase 17                                                 | Wbscr17       | 8,76             |
| fibulin 2                                                                                        | Fbln2         | 8,73             |
| collagen, type I, alpha 1                                                                        | Col1a1        | 8,61             |
| sema domain, immunoglobulin domain (Ig), short basic domain, secreted, (semaphorin) 3A           | Sema3a        | 8,61             |
| epiregulin                                                                                       | Ereg          | 8,54             |
| adenylate cyclase activating polypeptide 1 receptor 1                                            | Adcyap1r1     | 8,44             |
| forkhead box G1                                                                                  | Foxg1         | 8,44             |
| BMP-binding endothelial regulator                                                                | Bmper         | 8,43             |
| fibronectin 1                                                                                    | Fn1           | 8,35             |
| golgi associated kinase 1B                                                                       | Fam198b       | 8,33             |
| claudin 11                                                                                       | Cldn11        | 8,29             |
| chloride channel accessory 3A1                                                                   | Clca3a1       | 8,27             |
| collagen, type VIII, alpha 1                                                                     | Col8a1        | 8,26             |
| zinc finger protein 469                                                                          | Gm22          | 8,25             |
| biglycan                                                                                         | Bgn           | 8,24             |
| bone morphogenetic protein/retinoic acid inducible neural specific 3                             | Brinp3        | 8,23             |
| a disintegrin and metallopeptidase domain 23                                                     | Adam23        | 8,20             |
| transmembrane protein 45a                                                                        | Tmem45a       | 8,12             |
| procollagen-proline, 2-oxoglutarate 4-dioxygenase (proline 4-hydroxylase), alpha polypeptide III | P4ha3         | 8,11             |
| protocadherin 9                                                                                  | Pcdh9         | 8,11             |
| glycoprotein (transmembrane) nmb                                                                 | Gpnm          | 8,07             |
| cytochrome P450, family 1, subfamily b, polypeptide 1                                            | Cyp1b1        | 8,05             |
| RIKEN cDNA 3110039M20 gene                                                                       | 3110039M20Rik | 8,02             |
| CD80 antigen                                                                                     | Cd80          | 8,01             |
| mannose receptor, C type 2                                                                       | Mrc2          | 8,00             |
| collagen, type I, alpha 2                                                                        | Col1a2        | 7,97             |
| tenascin C                                                                                       | Tnc           | 7,96             |
| WAP four-disulfide core domain 18                                                                | Wfdc18        | 7,96             |
| cadherin 11                                                                                      | Cdh11         | 7,94             |
| lysyl oxidase-like 2                                                                             | Loxl2         | 7,93             |
| small proline-rich protein 3                                                                     | Sprr3         | 7,86             |
| matrix metallopeptidase 2                                                                        | Mmp2          | 7,86             |
| vestigial like family member 3                                                                   | Vgll3         | 7,85             |
| angiopoietin 4                                                                                   | Angpt4        | 7,83             |

| thrombospondin 2                                                   | Thbs2         | 7,81             |
|--------------------------------------------------------------------|---------------|------------------|
| platelet-derived growth factor receptor-like                       | Pdgfrl        | 7,80             |
| paired related homeobox 1                                          | Prrx1         | 7,80             |
| fibrillin 2                                                        | Fbn2          | 7,79             |
| bone morphogenic protein/retinoic acid inducible neural specific 1 | Brinp1        | 7,78             |
| a disintegrin and metallopeptidase domain 12                       | Adam12        | 7,77             |
| FK506 binding protein 10                                           | Fkbp10        | 7,76             |
| tissue inhibitor of metalloproteinase 1                            | Timp1         | 7,76             |
| Na <sup>+</sup> /K <sup>+</sup> transporting ATPase interacting 3  | Nkain3        | 7,73             |
| inhibin beta-A                                                     | Inhba         | 7,69             |
| CD5 antigen-like                                                   | Cd5l          | 7,69             |
| protein tyrosine phosphatase, receptor type, V                     | Ptprv         | 7,64             |
| retinoic acid early transcript delta                               | Raet1d        | 7,58             |
| tropomyosin 2, beta                                                | Tpm2          | 7,58             |
| forkhead box S1                                                    | Foxs1         | 7,58             |
| oxidized low density lipoprotein (lectin-like) receptor 1          | Olr1          | 7,53             |
| macrophage receptor with collagenous structure                     | Marco         | 7,52             |
| predicted gene, 37644                                              | Gm37644       | 7,50             |
| ventral anterior homeobox 2                                        | Vax2          | 7,49             |
| predicted gene 43517                                               | 3110039M20Rik | 7,49             |
| predicted gene, 32647                                              | RP23-231J2.1  | 7,48             |
| predicted gene 6806                                                | Gm6806        | 7,47             |
| high mobility group AT-hook 2                                      | Hmga2         | 7,46             |
| UDP-Gal:betaGlcNAc beta 1,3-galactosyltransferase, polypeptide 1   | B3galt1       | 7,43             |
| low density lipoprotein receptor-related protein 1                 | Lrp1          | 7,42             |
| pleiotrophin                                                       | Ptn           | 7,40             |
| short stature homeobox 2                                           | Shox2         | 7,39             |
| a disintegrin and metallopeptidase domain 19 (meltrin beta)        | Adam19        | 7,38             |
| cathepsin K                                                        | Ctsk          | 7,38             |
| matrix Gla protein                                                 | Mgp           | 7,36             |
| protocadherin 10                                                   | Pcdh10        | 7,34             |
| fibroblast growth factor 2                                         | Fgf2          | 7,32             |
| killer cell lectin-like receptor, subfamily A, member 4            | Klra4         | 7,32             |
| matrix metallopeptidase 14 (membrane-inserted)                     | Mmp14         | 7,31             |
| actin, alpha 2, smooth muscle, aorta                               | Acta2         | 7,29             |
| Na <sup>+</sup> /K <sup>+</sup> transporting ATPase interacting 4  | Nkain4        | 7,29             |
| S100 calcium binding protein A6 (calcyclin)                        | S100a6        | 7,28             |
| microtubule-associated protein 6                                   | Map6          | 7,26             |
| scavenger receptor cysteine rich family, 5 domains                 | Ssc5d         | 7,26             |
| collagen, type V, alpha 1                                          | Col5a1        | 7,25             |
| integrin alpha 11                                                  | Itga11        | 7,25             |
| cytotoxic T lymphocyte-associated protein 2 alpha                  | Ctla2a        | 7,25             |
| flavin containing monooxygenase 6                                  | Fmo6          | 7,24             |
| syntrophin, gamma 1                                                | Sntg1         | 7,24             |
| EYA transcriptional coactivator and phosphatase 4                  | Eya4          | 7,22             |
| layilin                                                            | Layn          | 7,20             |
| cadherin 18                                                        | Cdh18         | 7,18             |
| lumican                                                            | Lum           | 7,17             |
| desmin                                                             | Des           | 7,17             |
|                                                                    |               |                  |
| Gene Name                                                          | Gene          | log2 fold change |
| oxoglutarate (alpha-ketoglutarate) receptor 1                      | Oxgr1         | -11,73           |
| solute carrier family 22 (organic anion transporter), member 7     | Slc22a7       | -11,73           |
| solute carrier family 44, member 4                                 | Slc44a4       | -11,74           |
| transmembrane protease, serine 2                                   | Tmprss2       | -11,75           |
| UDP galactosyltransferase 8A                                       | Ugt8a         | -11,77           |
| barttin CLCNK type accessory beta subunit                          | Bsnd          | -11,77           |
| epithelial cell adhesion molecule                                  | Epcam         | -11,79           |

|                                                                                |               |        |
|--------------------------------------------------------------------------------|---------------|--------|
| dimethylglycine dehydrogenase precursor                                        | Dmgdh         | -11,80 |
| retinol dehydrogenase 16                                                       | Rdh16         | -11,82 |
| PZP, alpha-2-macroglobulin like                                                | Pzp           | -11,84 |
| solute carrier family 5 (sodium/glucose cotransporter), member1                | Slc5a1        | -11,89 |
| claudin 8                                                                      | Cldn8         | -11,91 |
| cadherin 1                                                                     | Cdh1          | -11,95 |
| N-acetyltransferase 8 (GCN5-related)                                           | Nat8          | -11,95 |
| gamma-glutamyltransferase 1                                                    | Ggt1          | -11,96 |
| cytochrome P450, family 4, subfamily a, polypeptide 10                         | Cyp4a10       | -11,97 |
| sodium channel, nonvoltage-gated 1 gamma                                       | Scnn1g        | -11,98 |
| serine (or cysteine) peptidase inhibitor, clade F, member 2                    | Serpinf2      | -11,98 |
| sclerostin domain containing 1                                                 | Sostdc1       | -11,99 |
| aldehyde dehydrogenase 8 family, member A1                                     | Aldh8a1       | -12,01 |
| polymeric immunoglobulin receptor                                              | Pigr          | -12,01 |
| arylacetamide deacetylase                                                      | Aadac         | -12,03 |
| solute carrier family 7 (cationic amino acid transporter, y+ system), member 9 | Slc7a9        | -12,03 |
| C-type lectin domain family 2, member h                                        | Clec2h        | -12,05 |
| glucose-6-phosphatase, catalytic                                               | G6pc          | -12,06 |
| protein C                                                                      | Proc          | -12,06 |
| coagulation factor XIII, beta subunit                                          | F13b          | -12,07 |
| solute carrier family 6 (neurotransmitter transporter, GABA), member 13        | Slc6a13       | -12,12 |
| guanylate cyclase activator 2b (retina)                                        | Guca2b        | -12,13 |
| solute carrier family 22, member 28                                            | Slc22a28      | -12,13 |
| meprin 1 beta                                                                  | Mep1b         | -12,14 |
| acyl-CoA synthetase medium-chain family member 5                               | Acsm5         | -12,14 |
| phenylalanine hydroxylase                                                      | Pah           | -12,16 |
| sulfotransferase family 1D, member 1                                           | Sult1d1       | -12,18 |
| hydroxy-delta-5-steroid dehydrogenase, 3 beta- and steroid delta-isomerase 2   | Hsd3b2        | -12,19 |
| myelin and lymphocyte protein, T cell differentiation protein                  | Mal           | -12,20 |
| transmembrane protein 72                                                       | Tmem72        | -12,21 |
| betaine-homocysteine methyltransferase 2                                       | Bhmt2         | -12,21 |
| solute carrier family 6 (neurotransmitter transporter), member 19              | Slc6a19       | -12,24 |
| solute carrier family 12, member 3                                             | Slc12a3       | -12,29 |
| cytochrome P450, family 2, subfamily j, polypeptide 13                         | Cyp2j13       | -12,31 |
| carbonic anhydrase 4                                                           | Car4          | -12,34 |
| chloride channel, voltage-sensitive Kb                                         | Clcnkb        | -12,40 |
| solute carrier family 12, member 1                                             | Slc12a1       | -12,41 |
| carboxylesterase 2C                                                            | Ces2c         | -12,44 |
| solute carrier family 22 (organic cation transporter), member 22               | Slc22a22      | -12,46 |
| PDZ domain containing 1                                                        | Pdzk1         | -12,48 |
| hydroxyacid oxidase 2                                                          | Hao2          | -12,48 |
| solute carrier family 26, member 4                                             | Slc26a4       | -12,49 |
| integrin beta 6                                                                | Itgb6         | -12,50 |
| secreted phosphoprotein 2                                                      | Spp2          | -12,54 |
| fructose biphosphatase 1                                                       | Fbp1          | -12,56 |
| ATP-binding cassette, sub-family A (ABC1), member 13                           | Abca13        | -12,57 |
| pipecolic acid oxidase                                                         | Pipox         | -12,63 |
| Rhesus blood group-associated C glycoprotein                                   | Rhcg          | -12,68 |
| cytochrome P450, family 2, subfamily j, polypeptide 11                         | Cyp2j11       | -12,72 |
| carboxylesterase 1D                                                            | Ces1d         | -12,76 |
| predicted gene, 19950                                                          | RP23-306P12.2 | -12,77 |
| UDP glycosyltransferases 3 family, polypeptide A1                              | Ugt3a1        | -12,78 |
| solute carrier family 47, member 1                                             | Slc47a1       | -12,80 |
| solute carrier family 22 (organic cation transporter), member 1                | Slc22a1       | -12,81 |
| serum/glucocorticoid regulated kinase 2                                        | Sgk2          | -12,83 |
| defensin beta 1                                                                | Defb1         | -12,83 |
| UDP glycosyltransferases 3 family, polypeptide A2                              | Ugt3a2        | -12,85 |
| solute carrier family 13 (sodium/sulfate symporters), member 1                 | Slc13a1       | -12,86 |

|                                                                                 |         |        |
|---------------------------------------------------------------------------------|---------|--------|
| cytochrome P450, family 2, subfamily a, polypeptide 4                           | Cyp2a4  | -12,90 |
| WAP four-disulfide core domain 15B                                              | Wfdc15b | -12,94 |
| solute carrier family 7, (cationic amino acid transporter, y+ system) member 13 | Slc7a13 | -12,95 |
| klotho                                                                          | Kl      | -13,05 |
| cytochrome P450, family 2, subfamily e, polypeptide 1                           | Cyp2e1  | -13,08 |
| solute carrier family 17 (sodium phosphate), member 1                           | Slc17a1 | -13,14 |
| solute carrier family 22 (organic anion transporter), member 8                  | Slc22a8 | -13,16 |
| indolethylamine N-methyltransferase                                             | Inmt    | -13,18 |
| calbindin 1                                                                     | Calb1   | -13,18 |
| calcium-sensing receptor                                                        | Casr    | -13,19 |
| cytochrome P450, family 2, subfamily j, polypeptide 5                           | Cyp2j5  | -13,32 |
| solute carrier family 22 (organic cation transporter), member 2                 | Slc22a2 | -13,34 |
| D-amino acid oxidase                                                            | Dao     | -13,37 |
| solute carrier family 13 (sodium-dependent dicarboxylate transporter), member 3 | Slc13a3 | -13,37 |
| solute carrier family 22 (organic anion transporter), member 6                  | Slc22a6 | -13,42 |
| transmembrane protein 174                                                       | Tmem174 | -13,45 |
| kidney expressed gene 1                                                         | Keg1    | -13,49 |
| kallikrein 1                                                                    | Klk1    | -13,57 |
| meprin 1 alpha                                                                  | Mep1a   | -13,67 |
| solute carrier organic anion transporter family, member 1a1                     | Slco1a1 | -13,78 |
| napsin A aspartic peptidase                                                     | Napsa   | -13,81 |
| UDP glucuronosyltransferase 2 family, polypeptide B38                           | Ugt2b38 | -13,82 |
| cytochrome P450, family 4, subfamily b, polypeptide 1                           | Cyp4b1  | -13,87 |
| serine peptidase inhibitor, Kazal type 1                                        | Spink1  | -13,89 |
| aldolase B, fructose-bisphosphate                                               | Aldob   | -14,04 |
| FXYD domain-containing ion transport regulator 2                                | Fxyd2   | -14,05 |
| hepatic nuclear factor 4, alpha                                                 | Hnf4a   | -14,05 |
| solute carrier family 34 (sodium phosphate), member 1                           | Slc34a1 | -14,10 |
| aldo-keto reductase family 1, member C21                                        | Akr1c21 | -14,16 |
| collectrin, amino acid transport regulator                                      | Tmem27  | -14,40 |
| solute carrier family 17 (sodium phosphate), member 3                           | Slc17a3 | -14,43 |
| myo-inositol oxygenase                                                          | Miox    | -14,43 |
| carboxylesterase 1F                                                             | Ces1f   | -14,72 |
| acyl-CoA synthetase medium-chain family member 2                                | Acsm2   | -14,77 |
| solute carrier family 27 (fatty acid transporter), member 2                     | Slc27a2 | -15,27 |
| phosphoenolpyruvate carboxykinase 1, cytosolic                                  | Pck1    | -16,11 |

**Supplementary Table S4:** List of significantly ( $p < 0.05$ ) enriched pathways in Sca-1<sup>+</sup> MACS-sorted cells isolated from the kidney directly after isolation in comparison to Sca-1<sup>+</sup> MACS-sorted cells on day 21 after isolation in cell culture. The input list contained all genes that were at least log<sub>2</sub> 1.5-fold induced or down-regulated as determined by RNAseq.

| <b>pathway up-regulated</b>                                  | <b>p-value</b> |
|--------------------------------------------------------------|----------------|
| Collagen degradation                                         | 3.88E-4        |
| Assembly of collagen fibrils and other multimeric structures | 2.97E-3        |
| Non-integrin membrane-ECM interactions                       | 3.43E-3        |
| Collagen chain trimerization                                 | 3.43E-3        |
| MET activates PTK2 signaling                                 | 4.94E-3        |
| Extracellular matrix organization                            | 5.04E-3        |
| Degradation of the extracellular matrix                      | 5.24E-3        |
| Crosslinking of collagen fibrils                             | 1.19E-2        |
| ECM proteoglycans                                            | 1.24E-2        |
| Invadopodia formation                                        | 1.35E-2        |
| Elastic fibre formation                                      | 1.99E-2        |
| MET promotes cell motility                                   | 1.99E-2        |
| Integrin cell surface interactions                           | 2.62E-2        |
| Collagen formation                                           | 2.81E-2        |
| Collagen biosynthesis and modifying enzymes                  | 4.43E-2        |
| <b>pathway down-regulated</b>                                | <b>p-value</b> |
| Abacavir transmembrane transport                             | 1.25E-2        |
